# Supplementary material for: Glycerol as a cheap, safe and sustainable solvent for the catalytic and regioselective β,β-diarylation of acrylates over palladium nanoparticles
Source: Royal Society of Chemistry journal article supplement (doi:10.1039/b925021b), 2010-01-01

# Glycerol as a cheap, safe and sustainable solvent for the catalytic and regioselective $\beta,\beta$ -diarylation of alkenes over palladium nanoparticles

Mathieu Delample,<sup>a,b</sup> Nicolas Villandier,<sup>a</sup> Jean-Paul Douliez,<sup>b</sup> Séverine Camy,<sup>c</sup> Jean-Stéphane Condoret,<sup>c</sup> Yannick Pouilloux,<sup>a</sup> Joël Barrault<sup>a</sup> and François Jérôme<sup>\*a</sup>

\* Corresponding author: francois.jerome@univ-poitiers.fr

## Supporting information

**1) Chemicals:** Triethylamine, palladium acetate (II), 3-iodo-4-methylaniline and 3-iodo-4-nitrotoluene were purchased to Sigma-Aldrich. Iodobenzene, n-butyl acrylate, cyclohexyl acrylate, iodonaphtalene and 2,4-dimethoxy-1-iodobenzene were bought to Acros. Glycerol was kindly provided by Stearinerie Dubois Fils. All solvents were purchased to Carlo-Erba and were used without any further purification. The synthesis and characterization of the aminopolysaccharide (AP) has been described in a previous paper (reference 8b in the manuscript).

**2) Apparatus:** <sup>1</sup>H and <sup>13</sup>C NMR spectra were recorded on a Bruker Avance 400 DPX 400. Chemical shift are expressed in ppm relative to Me<sub>4</sub>Si. IR spectra were recorded on a FT-IR Perkin Elmer (spectrum one) using ATR technology. Mass spectrometry analyses were performed on a GC/MS Varian 1200 Triple quadripole equipped with a column Factor Four VF5MS (30m x 0.25mm x 0.25 mm).

### **3) Chromatographic analyses**

The reaction progress was monitored on a Varian 3300 GPC equipped with a BPX5 column (12m x 0.22 mm; phase thickness: 0.25  $\mu$ m) supplied by SGE, a Flame Detector Ionization and an injector on-column.

#### 4) Recycling experiments

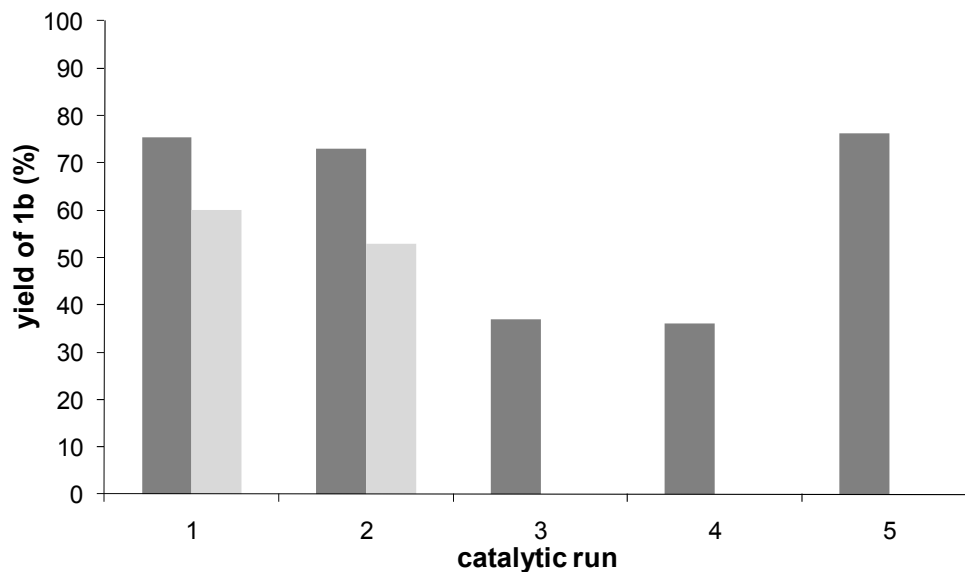

Figure S1 : recycling experiments ■ GC yield, ■ after extraction with scCO<sub>2</sub>

After extraction with scCO<sub>2</sub>, the Pd/AP catalyst can be selectively extracted from glycerol by liquid-liquid phase extraction. Among all tested organic solvent, dichloromethane was found the best organic solvent allowing a complete and selective extraction of the Pd/AP catalyst from the glycerol mixture. The recovered Pd/AP catalyst has been successfully reused in fresh glycerol without any obvious loss of activity (run 5) confirming that the drop of activity observed cycle after cycle is due to the accumulation of salts in the glycerol phase and not to a catalyst deactivation. Note also that, like in the case of water, triethylamine can be regenerated in glycerol using Amberlyst 21 as anion exchange resin (removal of HI). Therefore, in these experiments, it was possible to fully recycle the Pd/AP catalyst, the glycerol phase and the triethylamine. Conscious that utilization of dichloromethane increases here the environmental impact of our process, we are now working on the design of glycerol-tolerant palladium-based solid catalysts and this aspect, under investigation in our group, will be report in due course in a more specialized journal.

## 5) Solubility of glycerol in scCO<sub>2</sub>

The solubility of glycerol into CO<sub>2</sub> under high pressure has been estimated thanks to the equation of Chrastil<sup>1</sup> which correlates the solubility of solids and liquids in supercritical gases with the densities of the gas. Solubility is thus given by the equation (a) where  $c$  is the concentration of solute in kg per m<sup>3</sup> of a gas,  $\rho$  is the density of the gas in kg.m<sup>-3</sup>,  $e$ ,  $a$  and  $b$  are solubility parameters. For solubility of glycerol, we used the Adachi and Lu<sup>2</sup> modification who proposed a correlation for parameter  $e$  (equation b)

$$\text{(eq. a) } c = \rho^e \cdot \exp(a/T + b)$$

$$\text{(eq. b) } e = e_0 + e_1 \cdot \rho + e_2 \cdot \rho^2$$

Parameters  $e_0$ ,  $e_1$ ,  $e_2$ ,  $a$  and  $b$  for glycerol have been taken from the works of Sovova *et al.*<sup>3</sup>, where they have been fitted from experimental data. Density of carbon dioxide has been calculated thanks to the Lee-Kesler-Plocker (LKP) equation of state that gives a very satisfying representation of the experimental volumetric behaviour of supercritical CO<sub>2</sub>.<sup>4</sup> Solubility of glycerol has been calculated at 25 Mbar and 323.15K. Parameters for Chrastil equation, CO<sub>2</sub> density from LKP equation of state and values of solubility are presented in Table 3. Note that similar calculation has been done from water in order to compare its solubility into scCO<sub>2</sub> with that of glycerol (parameters  $e$ ,  $a$  and  $b$  for water have been taken from the equation of Chrastil<sup>1</sup>)

Table S1: solubility of glycerol and water in scCO<sub>2</sub> at 25MBar and 323.15K

| compound | $\rho_{\text{CO}_2}$ (kg.m <sup>-3</sup> ) | $a$ (K) | $b$    | $e$    | $c$ (kg.m <sup>-3</sup> of CO <sub>2</sub> ) |
|----------|--------------------------------------------|---------|--------|--------|----------------------------------------------|
| glycerol | 837.07                                     | -1672   | -13.22 | 2.3162 | 0.0604                                       |
| water    | 837.07                                     | -2826.4 | -0.807 | 1.549  | 2.389                                        |

[1] J. Chrastil, *J. Phys. Chem.*, **1982**, 86 (15), 3016-3021

[2] Y. Adachi, B. C.-Y. Lu, *Fluid Phase Equilib.*, **1983**, 14, 147-153

[3] H. Sovova, J. Jez, M. Khachatryan, *Fluid Phase Equilibria*, **1997**, 137 (1-2), 185-191

[4] U. Plocker, H. Knapp, J. Prausnitz, *Ind. Eng. Chem. Process Des. Dev.*, **1978**, 17, 324-332

## 6) Additional schemes, figures and tables

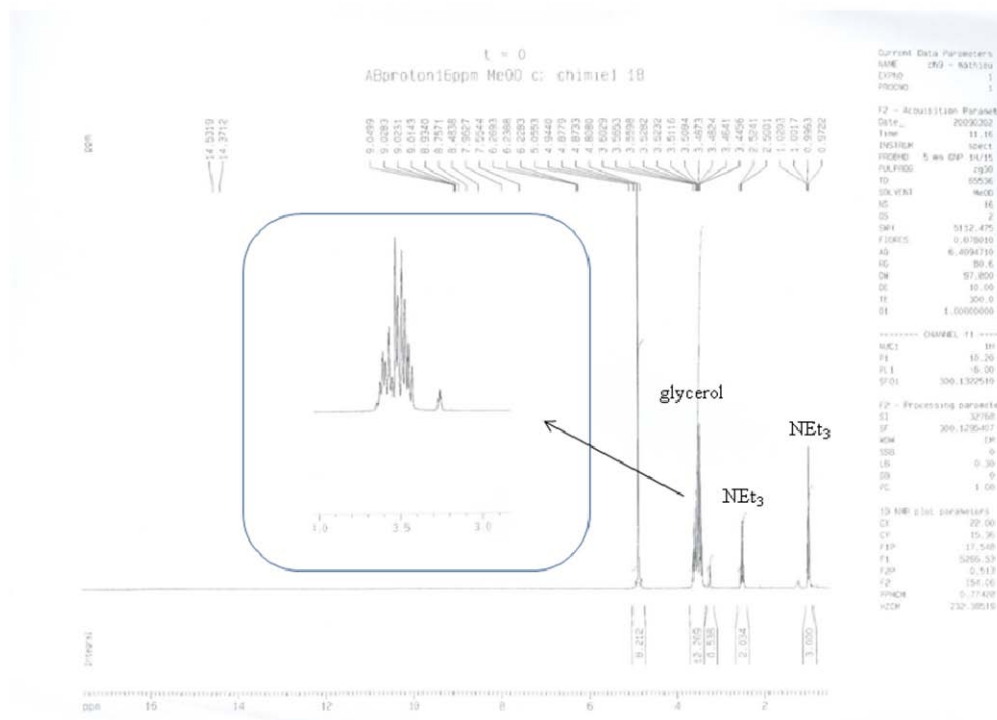

**Scheme S1** :  $^1\text{H}$  NMR spectrum of fresh glycerol with triethylamine and 200mg of Pd/AP

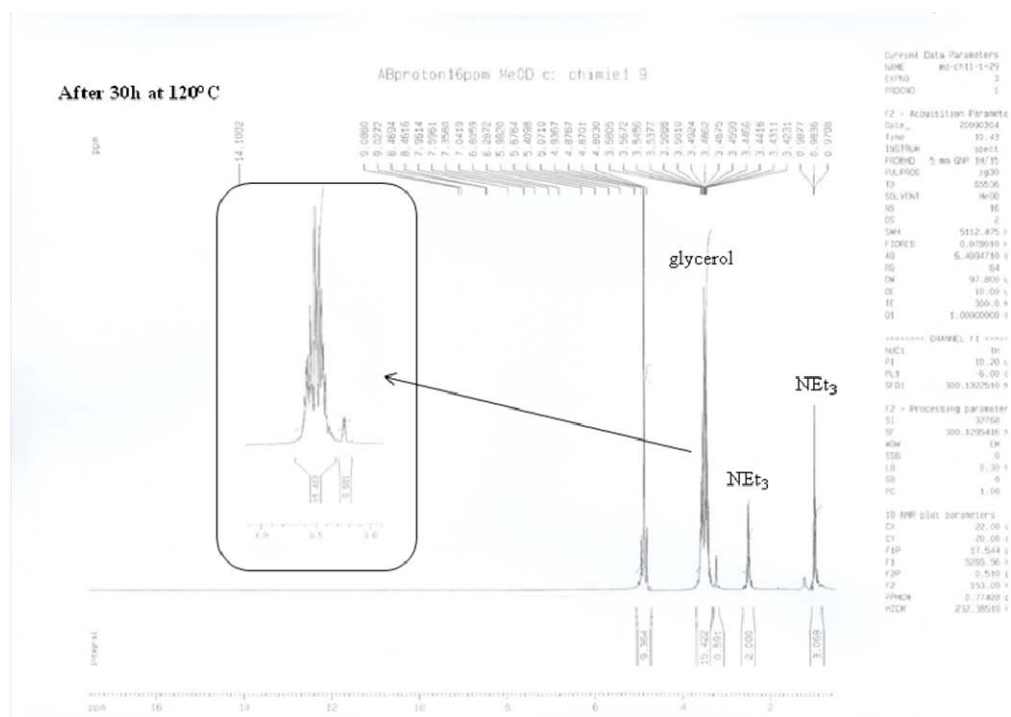

**Scheme S2** :  $^1\text{H}$  NMR spectrum of glycerol with triethylamine and 200mg of Pd/AP after 30 hours of heating at 120°C.

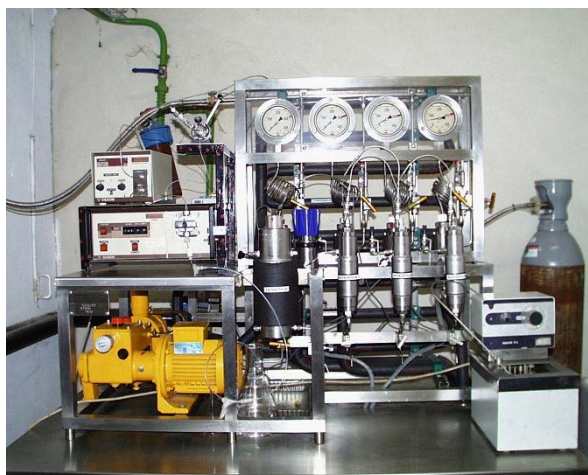

**Figure S2** : picture of the SEPREX SF200 pilot used for scCO<sub>2</sub> extractions

## 5) Full characterization of the reaction products

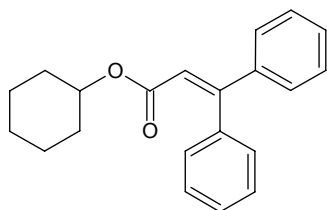

**1a**: Cyclohexyl 3,3-diphenylacrylate

<sup>1</sup>H NMR (300 MHz, CDCl<sub>3</sub>): 1.18-1.29 (m, 6H, -CH<sub>2</sub>), 1.46 (m, 2H, -CH<sub>2</sub>), 1.73 (m, 2H, -CH<sub>2</sub>), 4.70 (m, 1H, -CH-O), 6.36 (s, 1H, -CH=), 7.19-7.38 (m, 10H, Ph); <sup>13</sup>C NMR (300 MHz, CDCl<sub>3</sub>) : 23.7, 25.4, 31.5, 72.5, 118.2, 127.9, 128.3, 129.1, 139.2, 140.9, 155.8, 165.7; IR (cm<sup>-1</sup>) : 2933-2857 (C-H), 1715 (C=O), 1615 (C=C), 1445, 1359, 1259, 1162 (C-O), 1122, 1038, 1016, 1001, 914, 871, 768, 695; MS (EI): m/z = 306 [M<sup>+</sup>].

**1b: Butyl 3,3-diphenylacrylate**

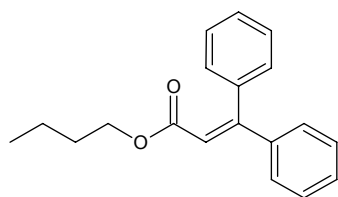

<sup>1</sup>H NMR (300 MHz, CDCl<sub>3</sub>): 0.85 (t, *J*=8 Hz, 3H, -CH<sub>3</sub>), 1.23 (m, 2H, -CH<sub>2</sub>), 1.44 (m, 2H, -CH<sub>2</sub>), 3.99 (t, *J*=8Hz, 2H, -CH<sub>2</sub>), 6.37 (s, 1H, -CH=), 7.21-7.38 (m, 10H, Ph); <sup>13</sup>C NMR (300 MHz, CDCl<sub>3</sub>) : 15.3, 16.8, 32.9, 64.5, 118.8, 120.9, 129.2-132.8, 141.3, 143.1, 158.7, 168.6; IR (cm<sup>-1</sup>): 2958-2872 (C-H), 1721 (C=O), 1615 (C=C), 1575, 1491, 1445, 1355, 1262, 1149 (C-O), 1062, 1031, 1001, 873, 769, 695; MS (EI): *m/z* = 280 [M<sup>+</sup>].

**1c: Cyclohexyl 3,3-di-2-naphthylacrylate**

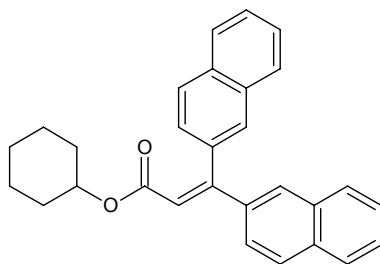

<sup>1</sup>H NMR (400 MHz, CDCl<sub>3</sub>): 0.78-1.45 (m, 10H), 4.45 (m, 1H, CH-O), 6.48 (s, 1H, -CH=), 7.23-7.45 (m, 8H, -CH=), 7.69-7.81 (m, 4H, -CH), 7.99 (d, *J*=8 Hz, 1H, -CH), 8.38 (d, *J*=8 Hz, 1H, -CH=); <sup>13</sup>C NMR (400 MHz, CDCl<sub>3</sub>) : 22.5, 24.2, 30.1, 71.6, 124.0-127.7, 129.8, 130.6, 132.7, 133.2, 137.9, 138.7, 150.9, 164.5; IR (cm<sup>-1</sup>) : 3045-2933-2856 (C-H), 1698 (C=O), 1610 (C=C), 1589, 1507, 1448, 1348, 1319, 1257, 1186, 1162 (C-O), 1122, 1097, 1037, 1016, 981, 908, 890, 864, 801, 772, 736; MS (EI): *m/z* =406 [M<sup>+</sup>].

**1d:** *Butyl 3,3-di-2-naphthylacrylate*

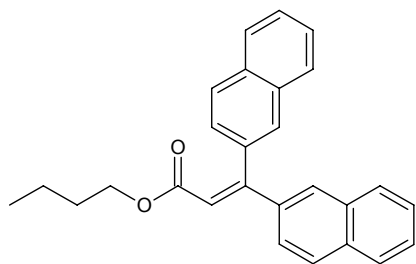

$^1\text{H}$  NMR (400 MHz,  $\text{CDCl}_3$ ): 0.60 (t,  $J=8\text{Hz}$ , 3H,  $-\text{CH}_3$ ), 0.81 (m, 2H,  $-\text{CH}_2$ ), 1.03 (m, 2H,  $\text{CH}_2$ ), 3.74 (t, 2H,  $-\text{CH}_2$ ), 6.49 (s, 1H,  $-\text{CH}=\text{C}$ ), 7.23 (m, 8H,  $-\text{CH}=\text{C}$ ), 7.73 (m, 4H,  $-\text{CH}=\text{C}$ ), 7.95 (d,  $J=8\text{Hz}$ , 1H), 8.37 (d,  $J=8\text{Hz}$ , 1H);  $^{13}\text{C}$  NMR (400 MHz,  $\text{CDCl}_3$ ): 13.6, 18.9, 30.2, 64.2, 125.1-129.0, 130.8, 131.5, 133.7, 134.2, 138.6, 139.6, 152.5, 166.0; IR ( $\text{cm}^{-1}$ ): 3056-2957-2929 (C-H), 1700 (C=O), 1609 (C=C), 1507, 1462, 1347, 1275, 1185, 1157 (C-O), 1098, 1060, 1021, 865, 803, 772, 736; MS (EI):  $m/z = 380$  [ $\text{M}^+$ ].

**1e:** *Cyclohexyl 3,3-bis(2-methyl-5-nitrophenyl)acrylate*

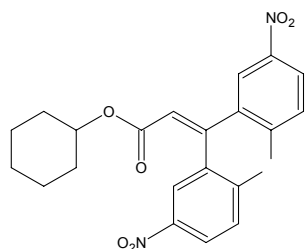

IR ( $\text{cm}^{-1}$ ): 2935-2858 (C-H), 1709 (C=O), 1607 (C=C), 1583, 1516-1339 (N=O), 1288, 1225, 1175 (C-O), 1037, 1014, 973, 830, 803, 754 ; MS (EI):  $m/z = 364$  [ $\text{M}^+$ ].

**1f:** *Butyl 3,3-bis(2,4-dimethoxyphenyl)acrylate*

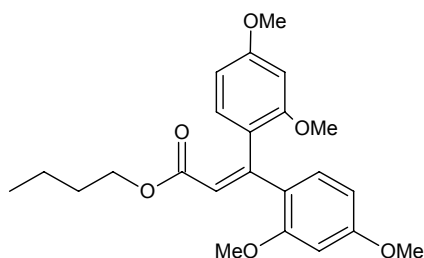

$^1\text{H}$  NMR (400 MHz,  $\text{CDCl}_3$ ): 0.78 (t,  $J=8$  Hz, 3H,  $-\text{CH}_3$ ), 1.17 (m, 2H,  $-\text{CH}_2$ ), 1.39 (m, 2H,  $-\text{CH}_2$ ), 3.62 (s, 3H,  $-\text{CH}_3$ ), 3.64 (s, 3H,  $-\text{CH}_3$ ), 3.71 (s, 3H,  $-\text{CH}_3$ ), 3.73 (s, 3H,  $-\text{CH}_3$ ), 3.90 (t,  $J=8\text{Hz}$ , 2H,  $-\text{CH}_2$ ), 6.29 (m, 1H,  $-\text{CH}=\text{C}$ ), 6.39 (m, 3H,  $-\text{CH}=\text{C}$ ), 6.40 (s, 1H,  $-\text{CH}=\text{C}$ ), 6.84 (m,

2H, -CH=);  $^{13}\text{C}$  NMR (400 MHz,  $\text{CDCl}_3$ ) : 13.1, 18.1, 29.3, 54.6, 62.7, 97.7, 103.0, 119.4, 121.7, 122.5, 129.5, 131.0, 147.8, 156.8, 157.9, 159.6, 160.2, 166.0 ; IR ( $\text{cm}^{-1}$ ): 2957-2837 (C-H), 1715 (C=O), 1602 (C=C), 1575, 1503, 1455, 1415, 1353, 1301, 1259, 1206, 1155 (C-O), 1029, 936, 830, 799, 737; MS (EI):  $m/z = 400$  [ $\text{M}^+$ ].

**1g:** Cyclohexyl 3,3-bis(2,4-dimethoxyphenyl)acrylate

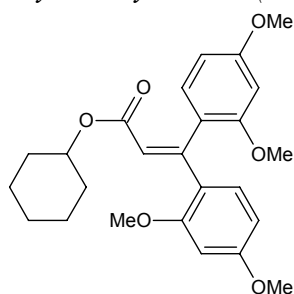

$^1\text{H}$  NMR (400 MHz,  $\text{CDCl}_3$ ): 0.78-1.70 (m, 10H, - $\text{CH}_2$ ), 3.63 (s, 3H, - $\text{CH}_3$ ), 3.65 (s, 3H, - $\text{CH}_3$ ), 3.72 (s, 3H, - $\text{CH}_3$ ), 3.74 (s, 3H, - $\text{CH}_3$ ), 4.60 (m, 1H, - $\text{CH-O}$ ), 6.30 (m, 1H, - $\text{CH=}$ ), 6.36 (m, 3H, - $\text{CH=}$ ), 6.40 (s, 1H, - $\text{CH=}$ ), 6.89 (m, 2H, - $\text{CH=}$ );  $^{13}\text{C}$  NMR (400 MHz,  $\text{CDCl}_3$ ): 21.7, 23.3, 27.9, 29.5, 53.3, 69.8, 96.4, 102.0, 119.1, 120.3, 128.1, 129.3, 146.0, 155.7, 158.5, 164.0; IR ( $\text{cm}^{-1}$ ): 2929-2855 (C-H), 1709 (C=O), 1603 (C=C), 1503, 1453, 1415, 1356, 1301, 1258, 1206, 1155 (C-O), 1031, 936, 831, 798; MS (EI) :  $m/z = 426$  [ $\text{M}^+$ ].

**1h:** Cyclohexyl 3,3-bis(2-methyl-5-aminophenyl)acrylate

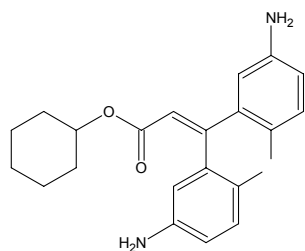

IR ( $\text{cm}^{-1}$ ): 3380 (N-H), 2933-2857 (C-H), 1705 (C=O), 1630 (C=C), 1501, 1449, 1258, 1169 (C-O), 1122, 1037, 1015, 980, 857, 808, 688; MS (EI):  $m/z = 364$  [ $\text{M}^+$ ].



**2a:** Cyclohexyl (2Z)-3-(2-naphthyl)-3-phenylacrylate

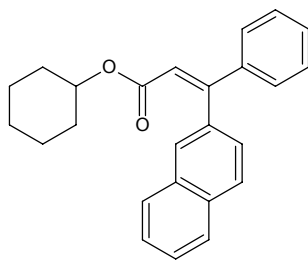

$^1\text{H}$  NMR ( $\text{CDCl}_3$ , 300 MHz, mixture of cis and trans 50/50): 0.81-1.82 (m, 20H,  $-\text{CH}_2$ ), 4.49 (m, 2H,  $-\text{CH}-\text{O}$ ), 4.81 (m, 2H,  $-\text{CH}-\text{O}$ ), 6.19 (s, 1H,  $-\text{CH}=\text{}$ ), 6.72 (s, 1H,  $-\text{CH}=\text{}$ ), 7.25-7.95 (m, 24H);  $^{13}\text{C}$  NMR ( $\text{CDCl}_3$ , 300 MHz): 22.6, 24.2, 25.7, 32.0, 73.7, 74.2, 119.5, 121.7, 123.7-140.4, 154.2, 155.0, 165.8, 166.3; IR ( $\text{cm}^{-1}$ ): 3056-2934-2857 (C-H), 1714 (C=O), 1613 (C=C), 1492, 1446, 1351, 1255, 1163 (C-O), 1122, 1038, 1014, 985, 863, 798, 770, 695; MS (EI):  $m/z = 356$  [ $\text{M}^+$ ].

**2b:** Butyl (2Z)-3-(2-naphthyl)-3-phenylacrylate

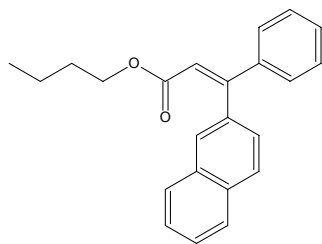

$^1\text{H}$  NMR ( $\text{CDCl}_3$ , 400 MHz, mixture of cis and trans 50/50): 0.57 (t,  $J=8\text{Hz}$ , 3H,  $-\text{CH}_3$ ), 0.76 (m, 3H), 1.01 (m, 2H), 1.17 (m, 4H), 1.41 (m, 2H), 3.68 (t,  $J=8\text{Hz}$ , 2H,  $-\text{CH}_2$ ), 4.00 (t,  $J=8\text{Hz}$ , 2H,  $-\text{CH}_2$ ), 6.10 (s, 1H,  $-\text{CH}=\text{}$ ), 6.62 (s, 1H,  $-\text{CH}=\text{}$ ), 7.18-7.85 (m, 24H,  $-\text{CH}=\text{}$ );  $^{13}\text{C}$  NMR ( $\text{CDCl}_3$ , 400 MHz): 12.5, 17.8, 18.1, 29.2, 29.5, 63.0, 63.2, 118.6, 120.5, 124.0-128.4, 130.2, 130.6, 132.5, 132.9, 136.0, 138.5, 139.0, 153.2, 154.0, 165.0, 165.4; IR ( $\text{cm}^{-1}$ ): 3057-2957-2871 (C-H), 1720 (C=O), 1614 (C=C), 1463, 1445, 1350, 1271, 1253, 1155 (C-O), 1061, 1018, 876, 798, 772, 736, 695; MS (EI):  $m/z = 330$  [ $\text{M}^+$ ].

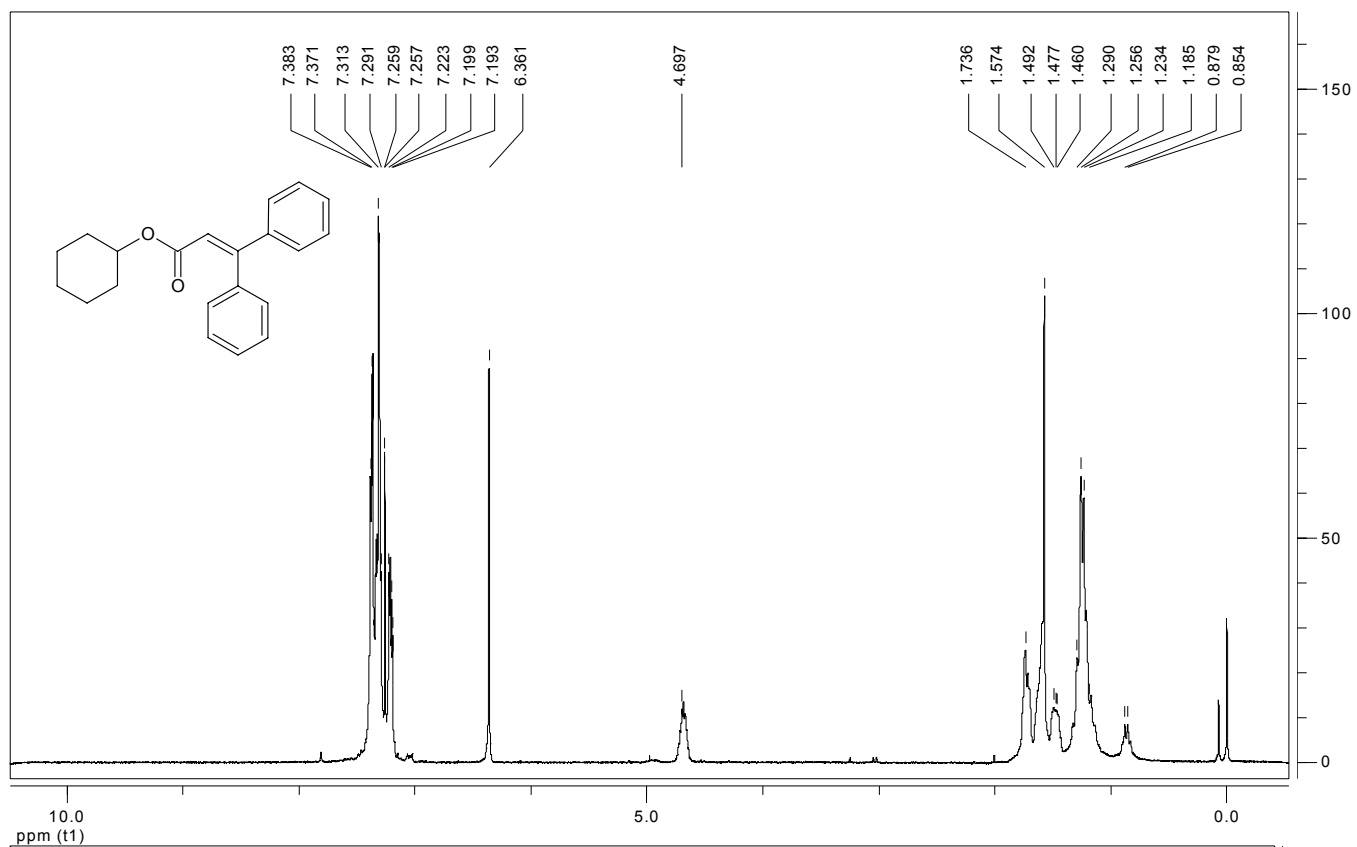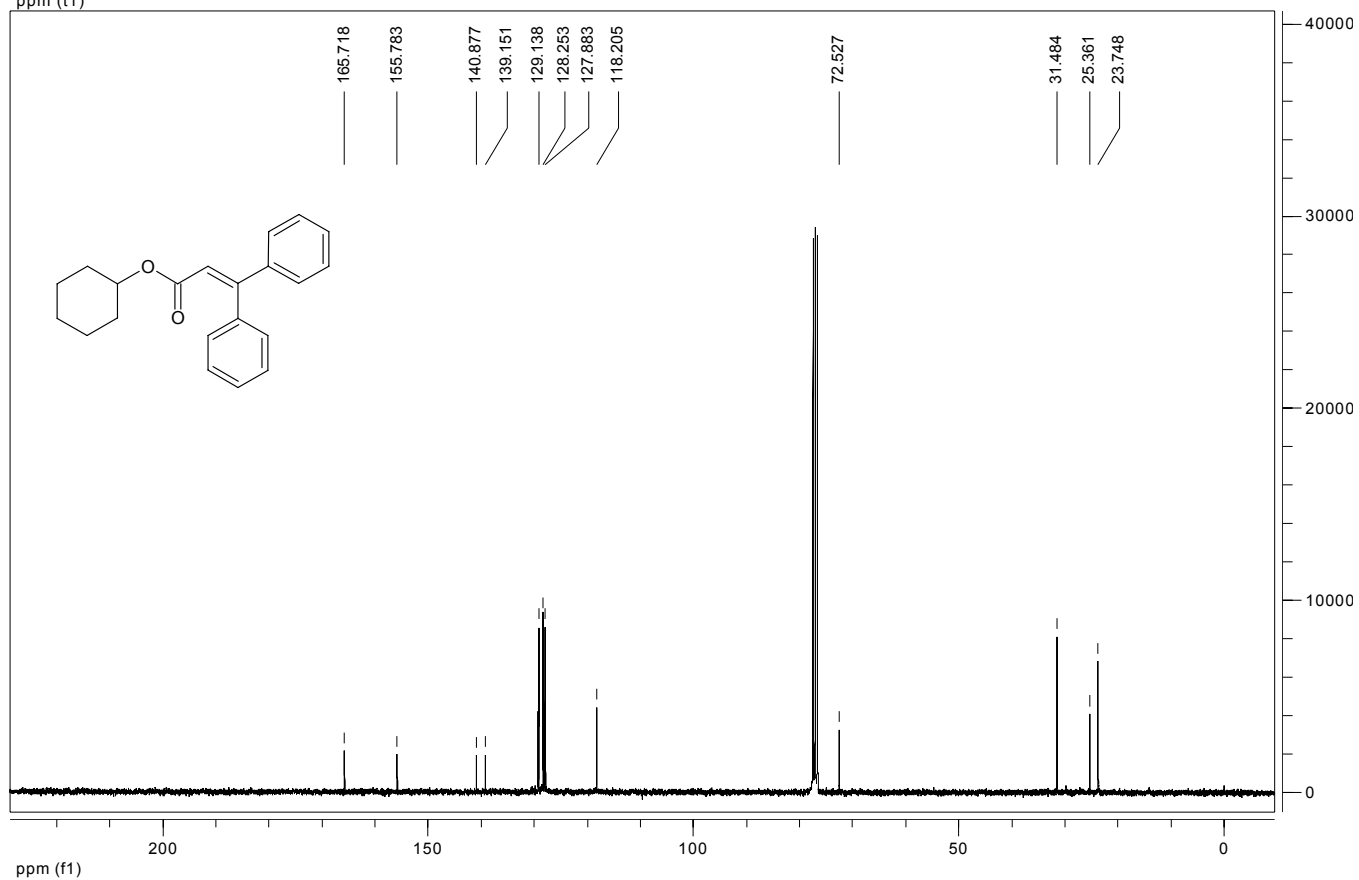

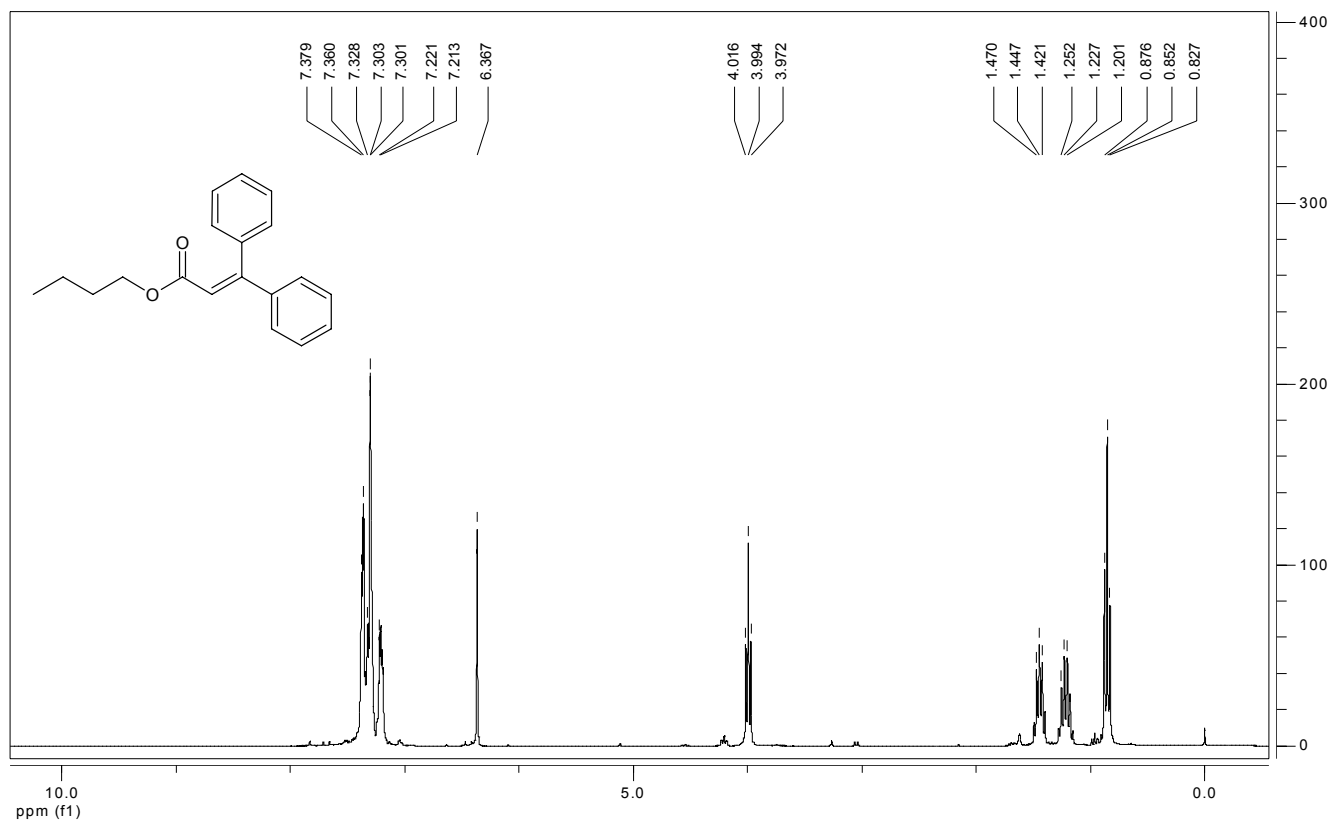

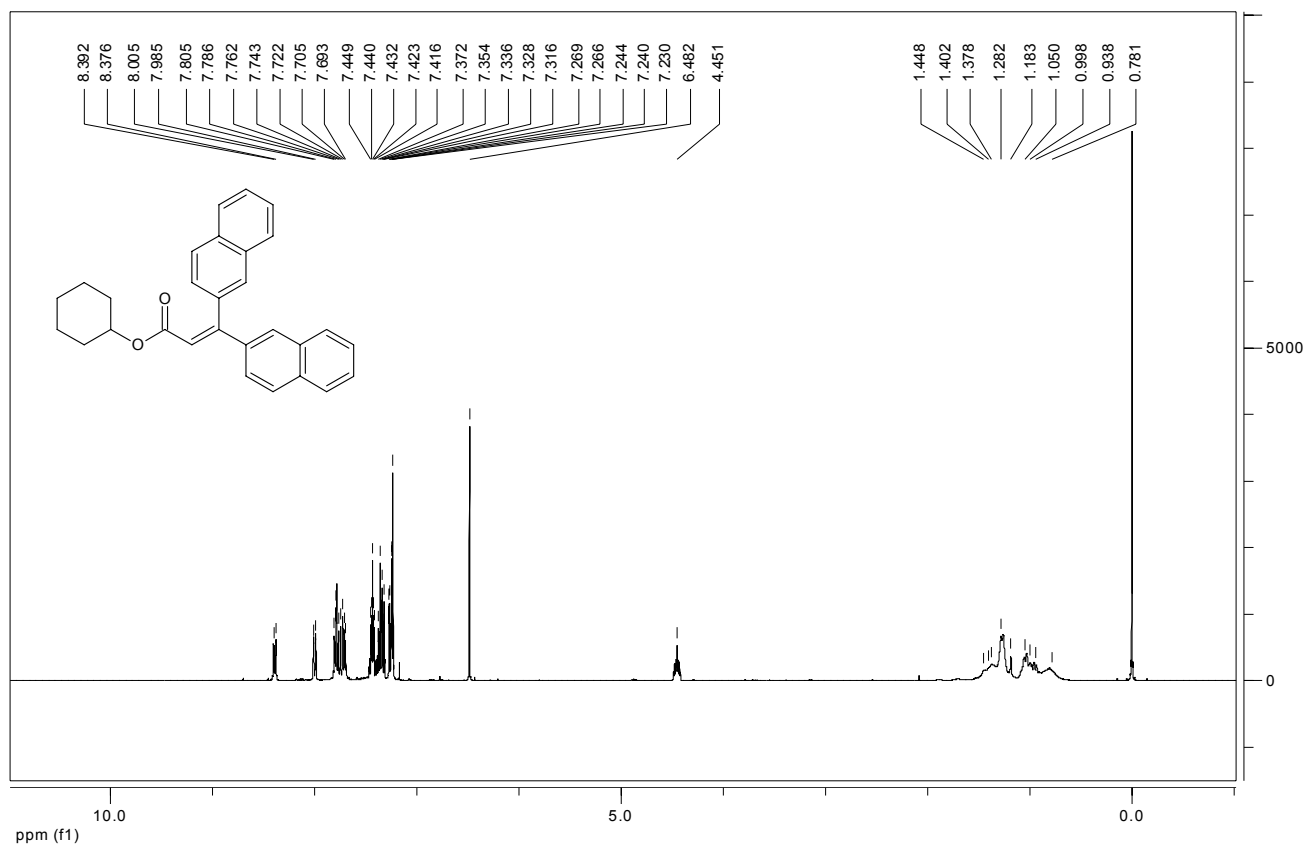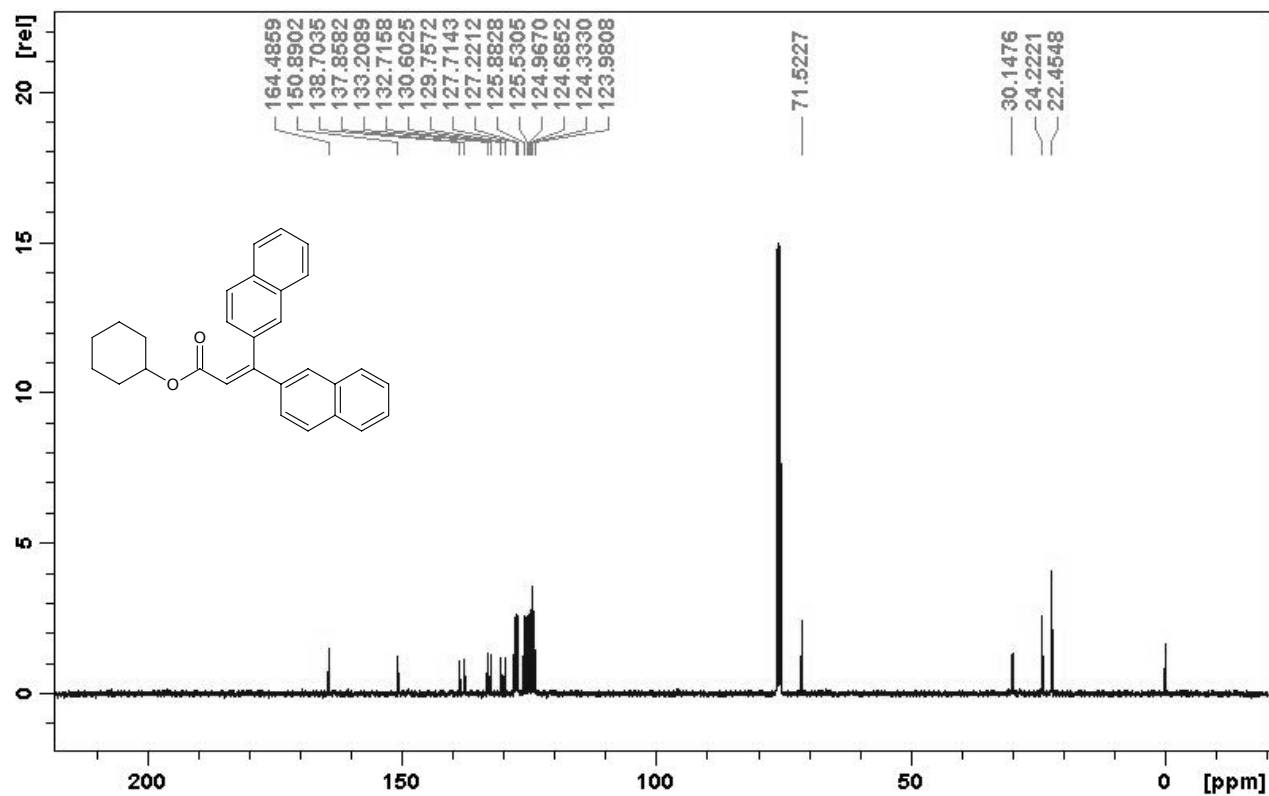

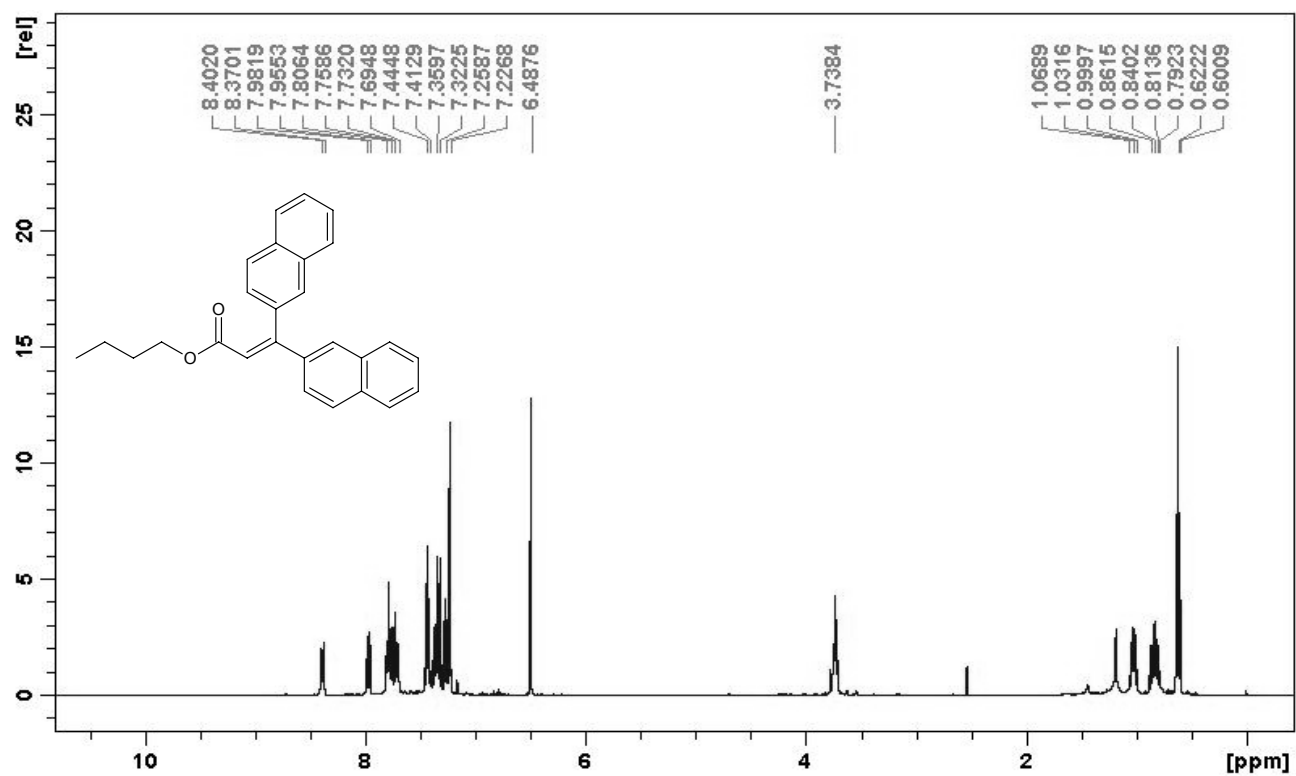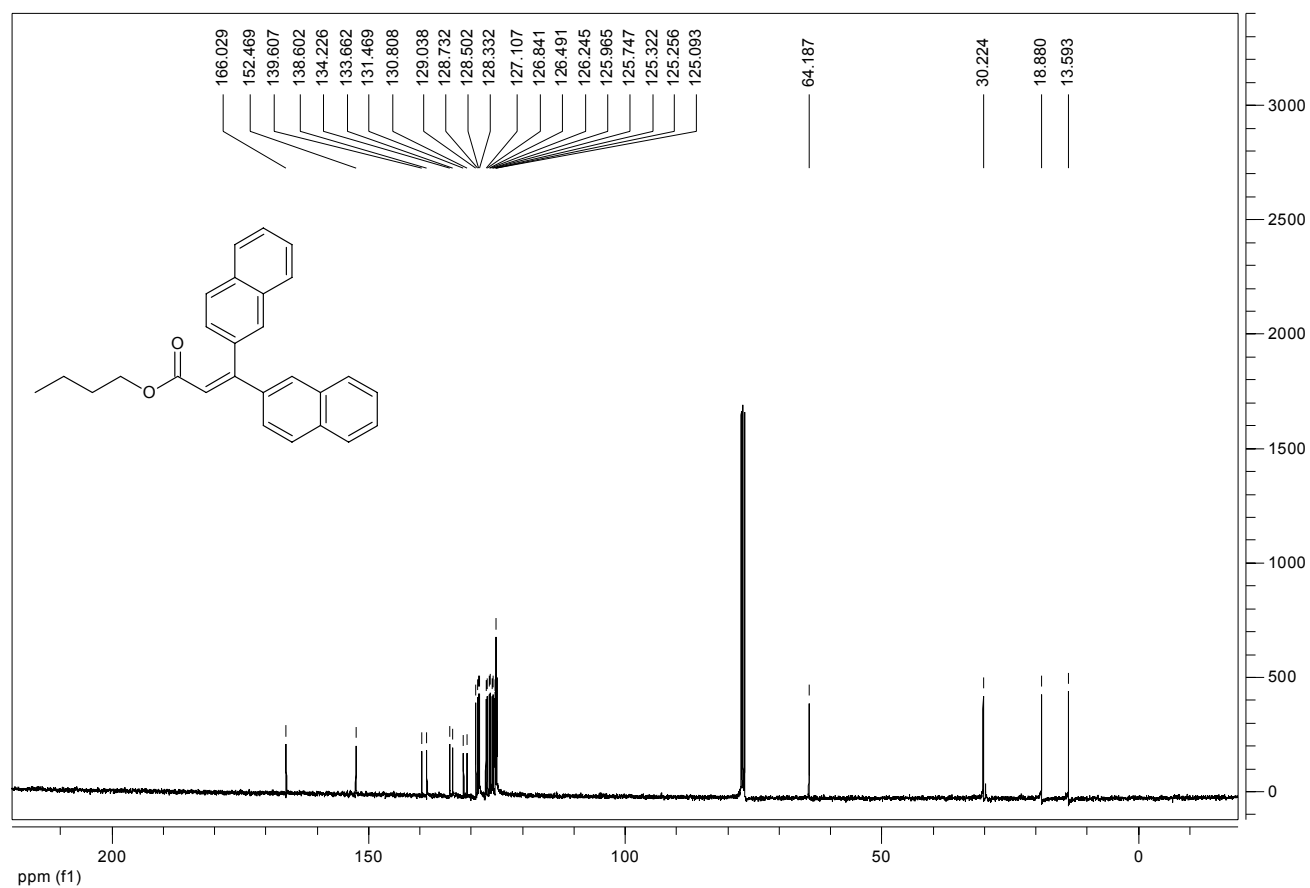

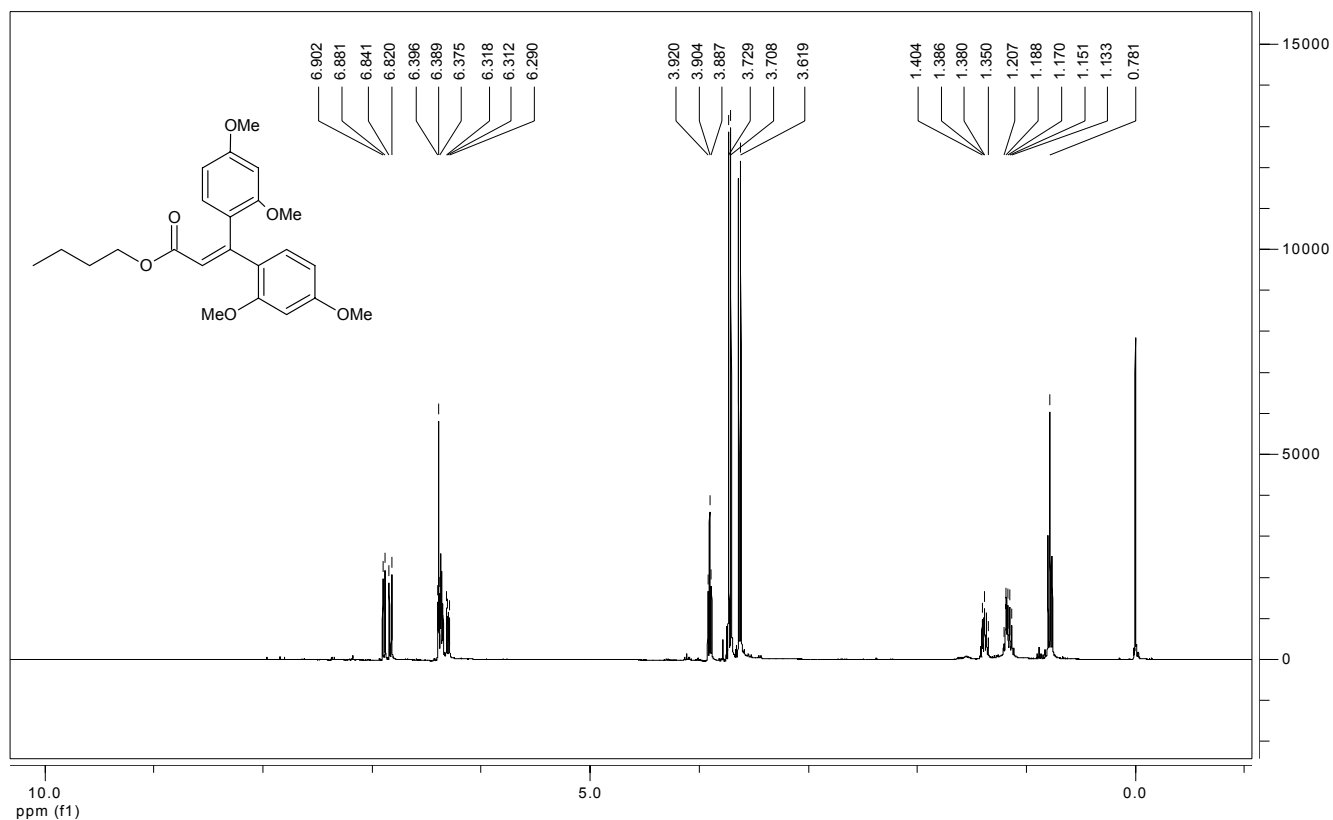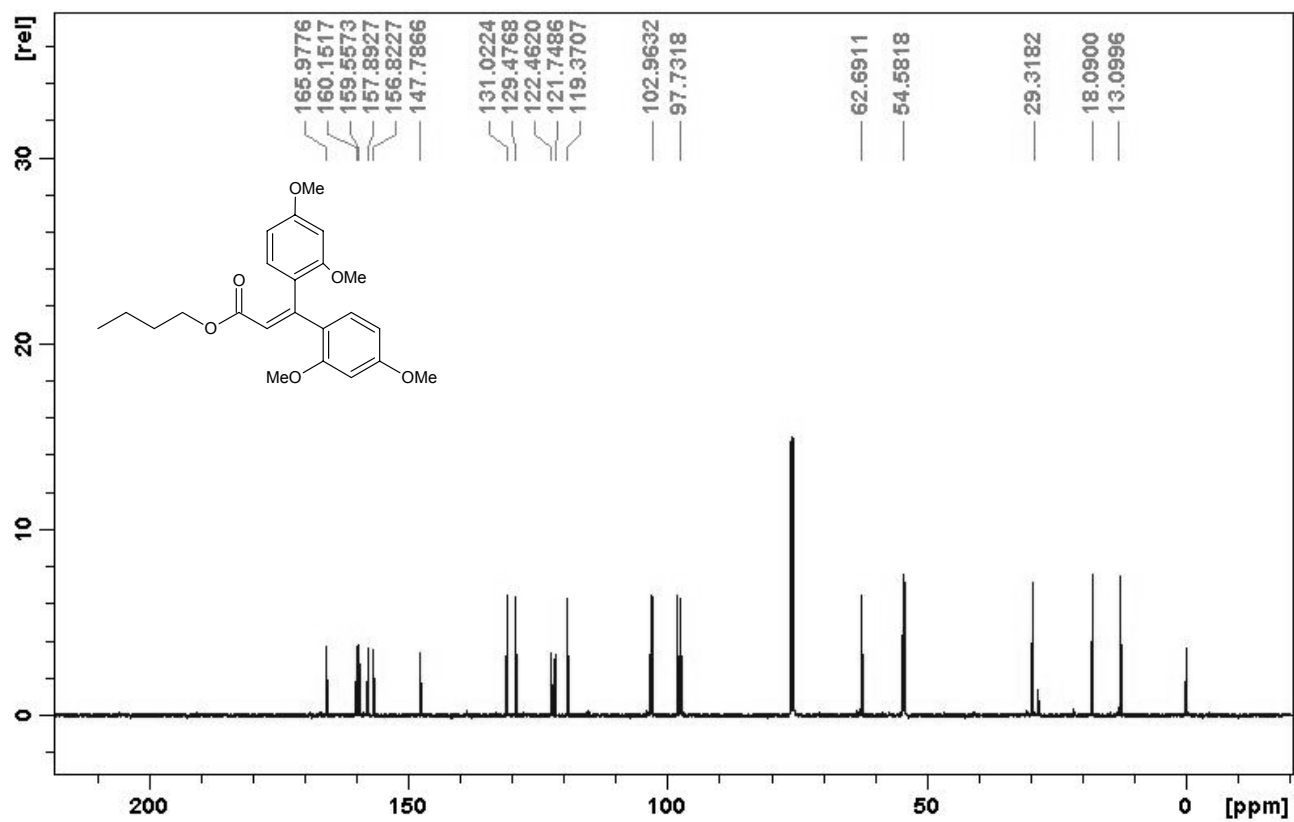

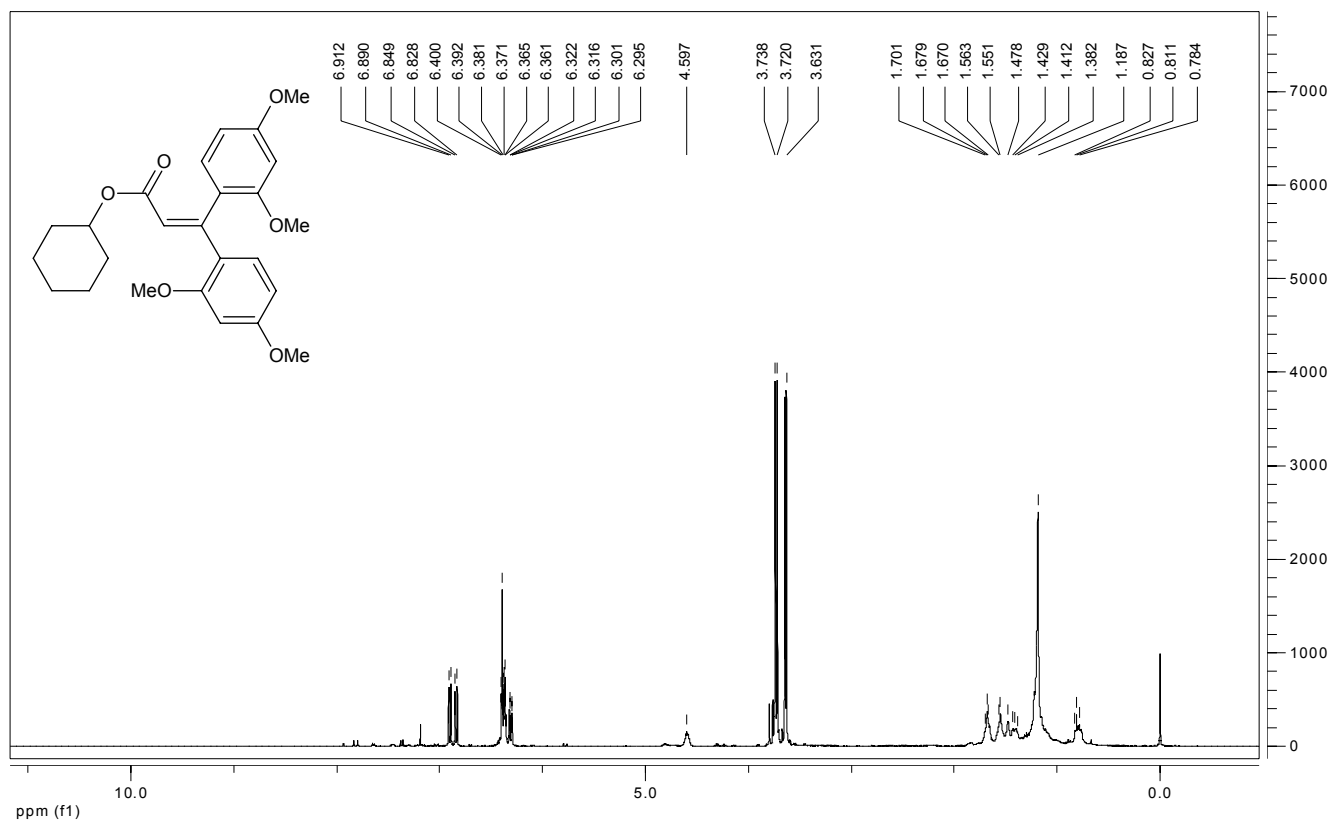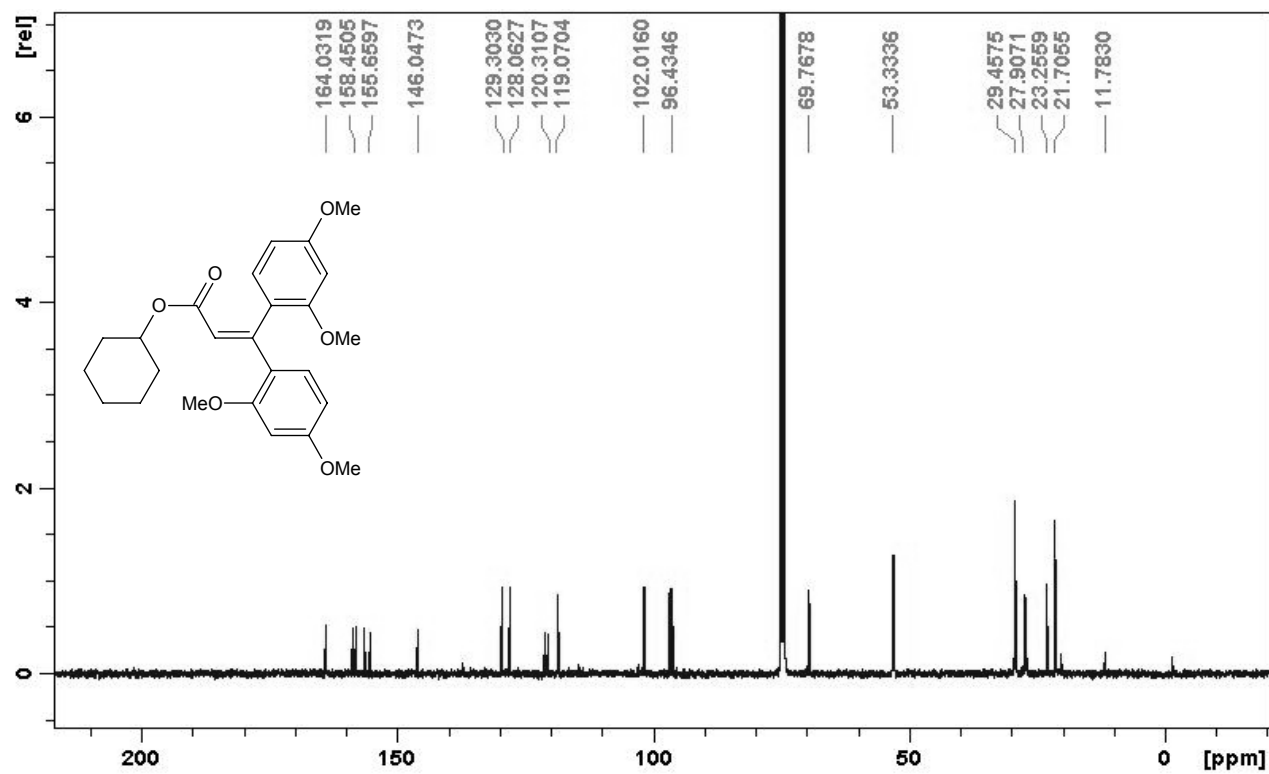

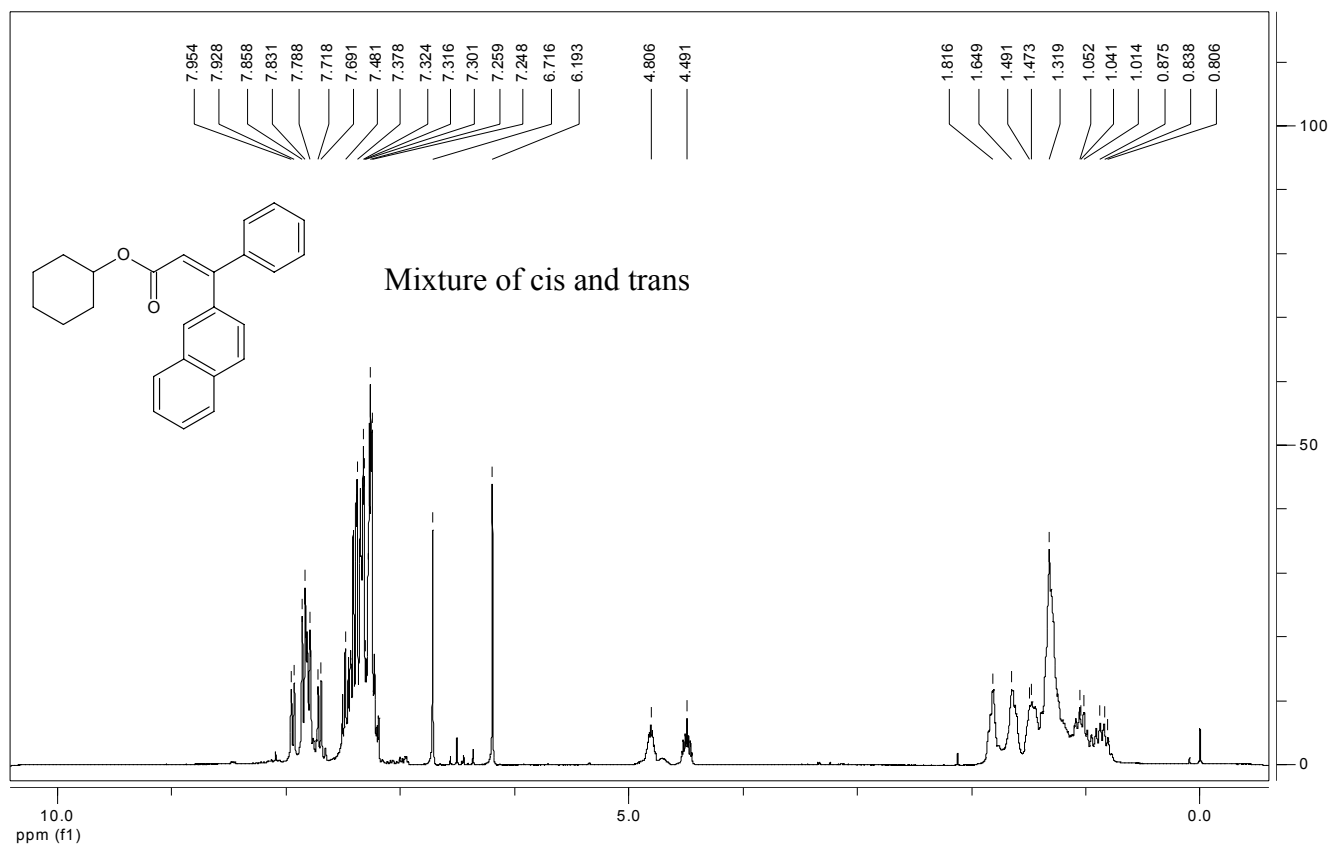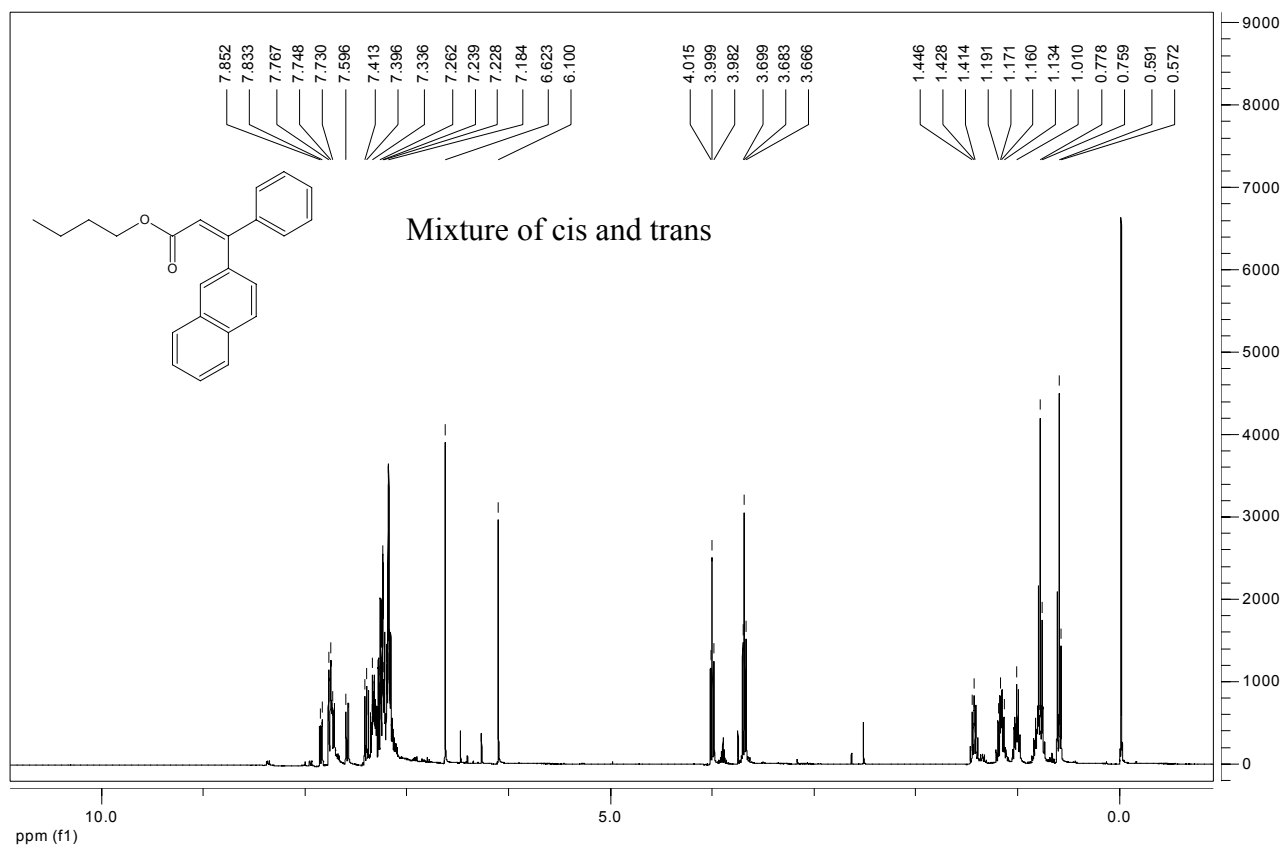



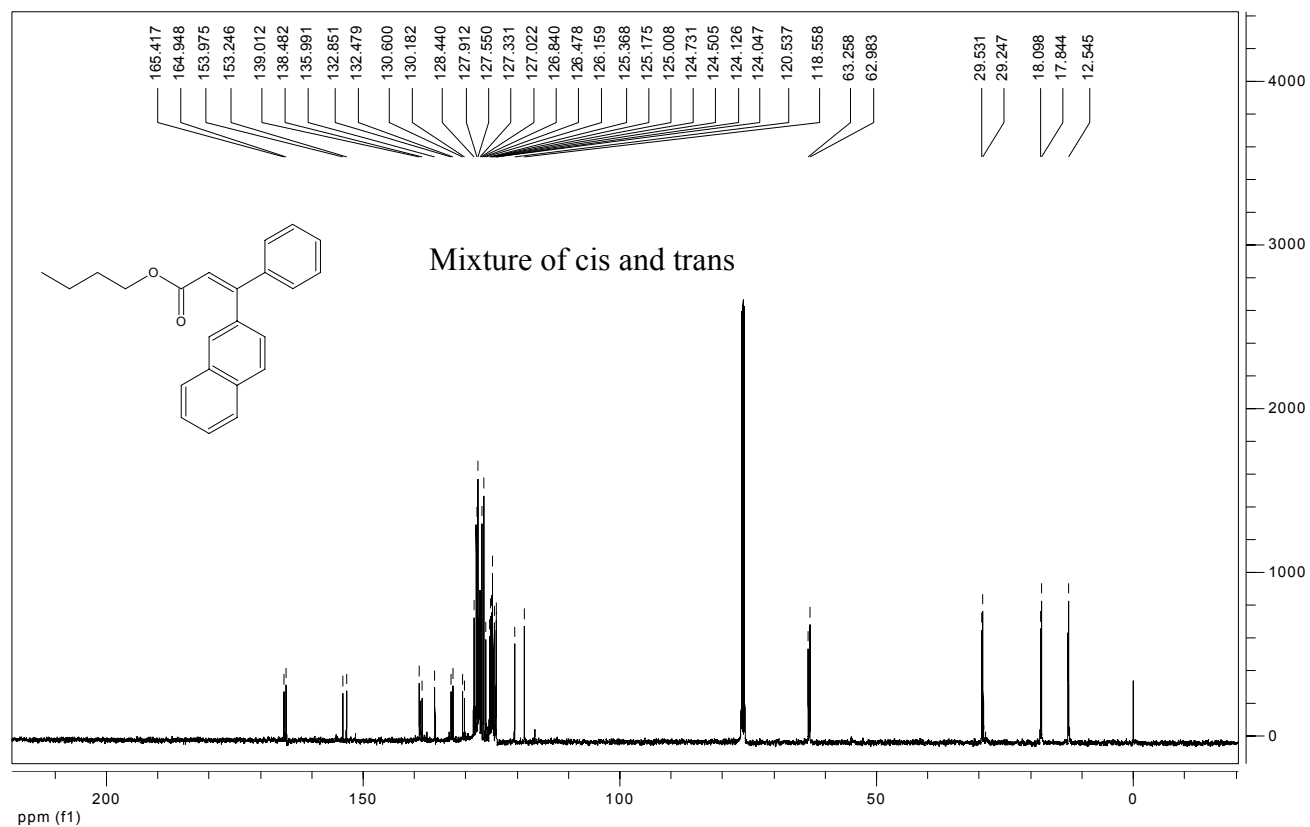

Supplement: b925021b.pdf [file b925021b.pdf]
